# Supplementary material for: Antibody-free isolation of rare cancer cells from blood based on 3D lateral dielectrophoresis
Source: Royal Society of Chemistry journal article supplement (doi:10.1039/c5lc00120j), 2015-01-01
Supplement: c5lc00120j1.pdf [file c5lc00120j1.pdf]

## Supplementary Materials

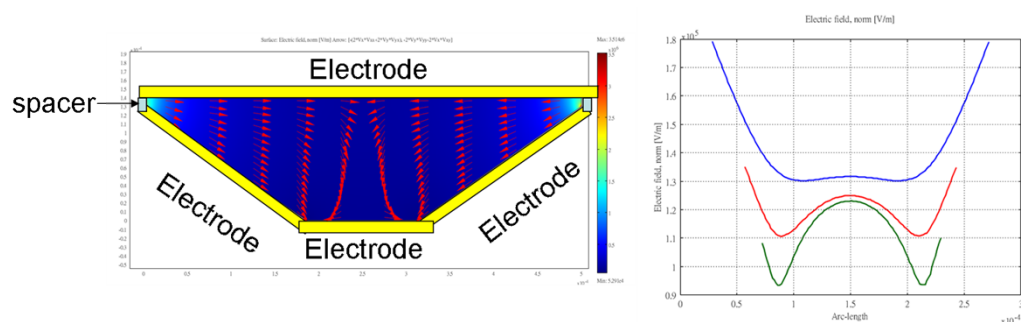

Figure S1 Finite element simulation of electric field for 3D trapezoid electrode configuration. The design of the trapezoid channel shows that the electric field distribution has two second minima field regions near the lower line.
